MASSEY, C., and VAN DER MEER, A. T., "Stability of Non-prismatic Cantilever Columns Under Tangential Loading," published in March, 1971, issue of the JOURNAL OF APPLIED MECHANICS, pp. 269-271.

More recent work has demonstrated that the lowest critical load for the columns considered in our Brief Note occurs with a distorted shape as shown in Fig. 1(b), not as shown in Fig. 1(a) which was the initial assumption. The relation between  $R$  and  $Q$  for this distortion is of the general form plotted in Fig. 2 which clearly shows the lowest critical value of  $Q$ , i.e., where  $dQ/dR = 0$ , without the necessity for a log plot. For  $\alpha = 0$ , the value of  $Q_{cr}$  is now  $2.04\pi^2$  which agrees very well with the value obtained by Ziegler. The values for Tables 1 and 2 of the Note have been recalculated.

**Table 1 Values of  $\alpha$  and  $Q_{cr}$  for a tapered column**

| $\alpha$ | $Q_{cr}$ |
|----------|----------|
| 0.0      | 20.1     |
| 0.1      | 21.2     |
| 0.2      | 22.3     |
| 0.3      | 23.4     |
| 0.4      | 24.5     |
| 0.5      | 25.6     |
| 0.6      | 26.7     |
| 0.7      | 27.8     |
| 0.8      | 29.0     |
| 0.9      | 30.1     |
| 1.0      | 31.2     |
| 1.1      | 32.4     |

**Table 2 Values of  $\delta$  and  $Q_{cr}$  for  $\gamma = 2.0$  for a stepped column**

| $\delta$ | $Q_{cr}$ |
|----------|----------|
| 0.05     | 40.2     |
| 0.25     | 38.1     |
| 0.35     | 32.5     |
| 0.50     | 24.6     |
| 0.65     | 20.8     |
| 0.75     | 20.1     |
| 0.95     | 20.1     |
| 1.00     | 20.1     |

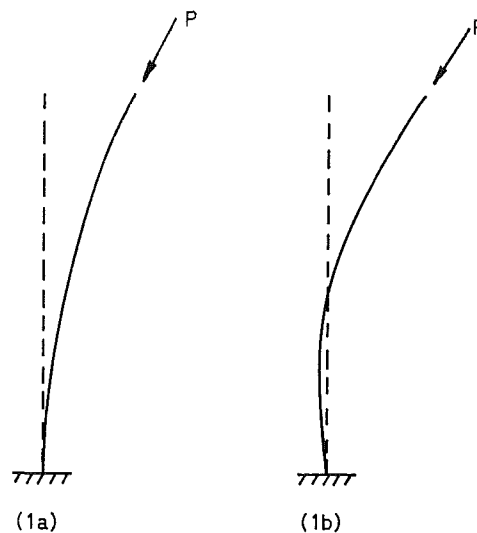

**Fig. 1 Deflected shape of column**

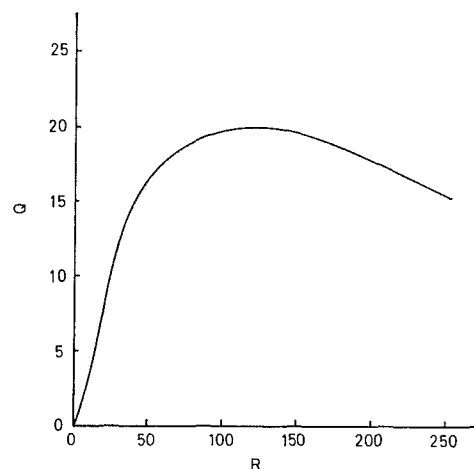

**Fig. 2 Relation between  $Q$  and  $R$  for a uniform column**
